# Supplementary material for: Tb 3+ and Ce 3+ as a functional couple for enhanced luminescence in YAG ceramics for X-ray imaging and high-power white LEDs and laser diodes
Source: Royal Society of Chemistry journal article supplement (doi:10.1039/d5ma00464k), 2025-01-01
Supplement: d5ma00464k1.pdf [file d5ma00464k1.pdf]

## SUPPLEMENTARY INFORMATION

### **Tb<sup>3+</sup> and Ce<sup>3+</sup> as a Functional Couple for Enhanced Luminescence in YAG Ceramics for X-Ray Imaging and High-Power White LEDs and Laser Diodes**

Anton Markovskiy<sup>1\*</sup>, Warut Chewpraditkul<sup>2</sup>, Przemysław Gołębiewski<sup>1</sup>, Paweł Socha<sup>1</sup>, Helena Węglarz<sup>1</sup>, Agnieszka Szysiak<sup>1</sup>, Vitezslav Jary<sup>3</sup>, R. Kučerková<sup>3</sup>, Robert Tomala<sup>4,5</sup>, Akira Yoshikawa<sup>6</sup>, Shunshuke Kurosawa<sup>6</sup>, Ryszard Buczyński<sup>1</sup>, Weerapong Chewpraditkul<sup>2</sup>, Karol Bartosiewicz<sup>3\*</sup>

<sup>1</sup>*Lukasiewicz Research Network - Institute of Microelectronics and Photonics, Aleja Lotników 32/46, 02-668, Warsaw, Poland*

<sup>2</sup>*Department of Physics, Faculty of Science, King Mongkut's University of Technology Thonburi 126 Pracha-uthit, Thung-khru, Bangkok 10140, Thailand*

<sup>3</sup>*Institute of Physics of the Czech Academy of Sciences, Cukrovarnicka 10, 16200, Prague, Czech Republic*

<sup>4</sup>*Institute of Low Temperature and Structural Research Polish Academy of Sciences, Okólna 2, 50-422 Wrocław, Poland*

<sup>5</sup>*Faculty of Chemistry and Geosciences, Vilnius University, Naugarduko g. 24, 03225 Vilnius, Lithuania,*

<sup>6</sup>*Institute for Materials Research, Tohoku University, 2-1-1 Katahira, Sendai 9808577, Japan*

*corresponding authors' emails: [anton.markovskiy@imif.lukasiewicz.gov.pl](mailto:anton.markovskiy@imif.lukasiewicz.gov.pl), [bartosiewicz@fzu.cz](mailto:bartosiewicz@fzu.cz)*

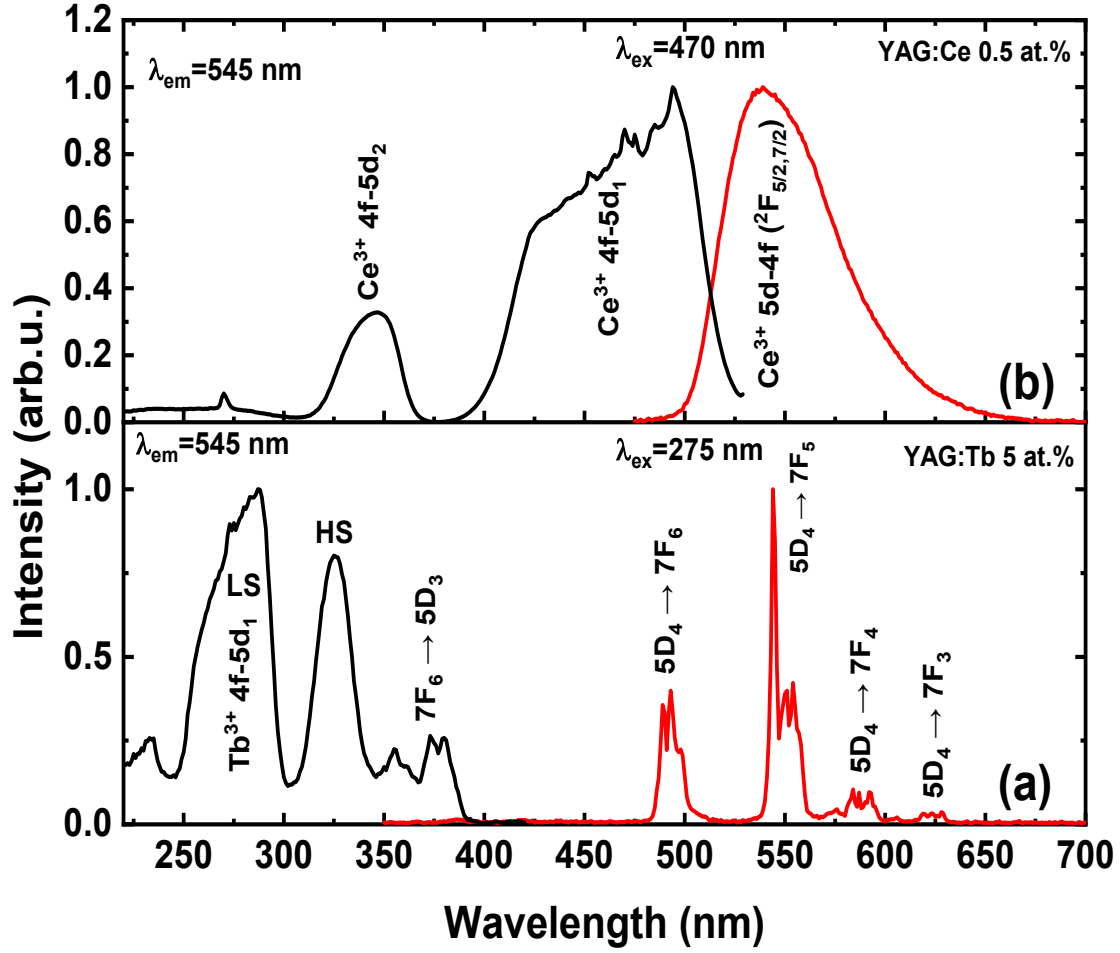

Fig. S1. (a) Photoluminescence excitation (PLE) spectrum monitored at 545 nm and photoluminescence (PL) emission spectrum under 470 nm excitation for  $\text{Ce}^{3+}$  ions in YAG:Ce ceramics. (b) PLE spectrum monitored at 545 nm and PL emission spectrum under 275 nm excitation for  $\text{Tb}^{3+}$  ions in YAG:Tb ceramics.

Fig. S1a presents the photoluminescence excitation spectrum monitored at 545 nm and the photoluminescence emission spectrum recorded under 470 nm excitation for YAG: $\text{Ce}^{3+}$  (0.5 at.%) ceramics. The PLE spectrum exhibits two prominent excitation bands centered at approximately 360 nm and 460 nm, which are attributed to the  $4f \rightarrow 5d_2$  and  $4f \rightarrow 5d_1$  electronic transitions of  $\text{Ce}^{3+}$  ions, respectively. Additionally, the enhanced background observed below 300 nm may be associated with defect-related excitation processes, potentially arising from intrinsic lattice imperfections such as  $\text{Y}_{\text{Al}}^{\text{x}}$  dislocations, oxygen vacancies, or transitions to higher-lying 5d states of

Ce<sup>3+</sup>. Upon excitation at 470 nm, the PL spectrum displays a broad asymmetric emission band centered at approximately 545 nm, resulting from the 5d<sub>1</sub> → 4f radiative transitions of Ce<sup>3+</sup>, specifically 5d<sub>1</sub> → 4f (<sup>2</sup>F<sub>5/2</sub>, <sup>2</sup>F<sub>7/2</sub>). The broadness of this emission is due to the strong coupling of 5d electrons to lattice vibrations and inhomogeneous broadening caused by site variations within the YAG matrix. Fig. S1b PLE spectrum monitored at 545 nm and the PL emission spectrum recorded under 275 nm excitation for YAG:Tb<sup>3+</sup> (5 at.%) ceramics. The PLE spectrum reveals broad excitation bands located below 400 nm, which are assigned to spin-allowed 4 → 5d<sub>1</sub> transitions of Tb<sup>3+</sup> ions. These bands exhibit characteristic splitting into low-spin (LS) and high-spin (HS) components due to the influence of crystal field effects on the 5d orbitals. The PL spectrum reveals a series of well-resolved emission lines in the 480–620 nm range, corresponding to the intra-4f transitions from the excited <sup>5</sup>D<sub>4</sub> state to the lower-lying <sup>7</sup>F<sub>J</sub> levels of Tb<sup>3+</sup> ions. The most intense emission peak is observed at approximately 545 nm, attributed to the <sup>5</sup>D<sub>4</sub> → <sup>7</sup>F<sub>5</sub> transition, which is responsible for the characteristic green luminescence of Tb<sup>3+</sup>.
